# Supplementary material for: Modulation of cecal microbiota and fecal metabolism in mice by walnut protein
Source: Royal Society of Chemistry journal article supplement (doi:10.1039/d3fo04403c), 2023-12-27
Supplement: d3fo04403c1.pdf [file d3fo04403c1.pdf]

| ID       | Metabolite                                                             | Regulate |
|----------|------------------------------------------------------------------------|----------|
| pos_801  | 2,6,10,10-Tetramethyl-1-oxaspiro[4.5]decan-6-ol                        | up       |
| pos_1399 | (S,E)-Zearalenone                                                      | up       |
| pos_1578 | Oxindole                                                               | up       |
| pos_1657 | Dictyoquinazol C                                                       | up       |
| pos_1650 | 13,14-dehydro-15-cyclohexyl Carbaprostacyclin                          | up       |
| pos_1723 | 11-Hydroxyandrosterone                                                 | up       |
| pos_1870 | Chenodeoxycholic Acid                                                  | up       |
| pos_1914 | 25-hydroxy-24-oxovitamin D3                                            | up       |
| pos_2037 | (+/-)-(Z)-2-(5-Tetradecenyl)cyclobutanone                              | up       |
| pos_2109 | 4E,15Z-Bilirubin IXa                                                   | up       |
| pos_3644 | Hygromycin B                                                           | up       |
| pos_3834 | 1-(2,4,6-trihydroxyphenyl)-3-(3,4,5-trihydroxyphenyl)propane-1,2-dione | up       |
| pos_4155 | Mytilitol                                                              | up       |
| pos_4171 | Vidarabine                                                             | up       |
| pos_4172 | 3-Methyl-5-propyl-2-furanundecanoic acid                               | up       |
| pos_4275 | 1,4-Methylimidazoleacetic acid                                         | up       |
| neg_900  | [3-(2,5-dihydroxyphenyl)-3-oxo-1-phenylpropoxy]sulfonic acid           | up       |
| neg_3769 | PS(14:1(9Z)/20:4(5Z,8Z,11Z,14Z))                                       | up       |
| pos_870  | 13-epi-12-oxo Phytodienoic Acid                                        | down     |
| pos_445  | Lotaustralin                                                           | down     |
| pos_594  | Tatridin B                                                             | down     |
| pos_946  | Ile Phe Ala Gly Lys                                                    | down     |
| pos_1324 | Hydroxypropyl-Tryptophan                                               | down     |
| pos_1327 | (5R)-5-Hydroxyhexanoic acid                                            | down     |
| pos_1328 | Isopropyl beta-D-glucoside                                             | down     |
| pos_1448 | Pseudoecgonine                                                         | down     |
| pos_1512 | Alpha-Hydroxymetoprolol                                                | down     |
| pos_1528 | 2,3,4,5,6,7-Hexahydro-6,7-dimethylcyclopent[b]azepin-8(1H)-one         | down     |
| pos_1566 | (+)-Marmasmic acid                                                     | down     |
| pos_1821 | 16-Hydroxy hexadecanoic acid                                           | down     |
| pos_2062 | His Phe Tyr Leu                                                        | down     |
| pos_2334 | Ochratoxin A                                                           | down     |
| pos_2510 | Ustiloxin B                                                            | down     |
| pos_2858 | LysoPE(0:0/22:0)                                                       | down     |
| pos_3019 | PS(14:1(9Z)/18:3(9Z,12Z,15Z))                                          | down     |
| pos_3184 | Neuromedin N                                                           | down     |
| pos_3344 | Asn Ser Val Leu                                                        | down     |
| pos_3501 | Trans-EKODE-(E)-Ib                                                     | down     |
| pos_3512 | 12-OPDA                                                                | down     |
| pos_3582 | 12-hydroxyicosanoic acid                                               | down     |
| pos_3659 | 3-Methyl-1-phenyl-1-butanone                                           | down     |
| pos_3662 | 2-Hydroxyacorenone                                                     | down     |
| pos_3664 | Benzenemethanol, 2-(2-hydroxypropoxy)-3-methyl-                        | down     |

---

|          |                                                                      |      |
|----------|----------------------------------------------------------------------|------|
| pos_3676 | 4-hydroxy-1-(4-methoxyphenyl)pentan-3-one                            | down |
| pos_3823 | Nuttalline                                                           | down |
| pos_3828 | Thr Cys Glu Trp                                                      | down |
| pos_3832 | Gingerenone C                                                        | down |
| pos_3833 | Cucurbitic acid                                                      | down |
| pos_3855 | Undecanoic acid                                                      | down |
| pos_3877 | Carboxyprimaquine                                                    | down |
| pos_3882 | Cyclic N-Acetylserotonin glucuronide                                 | down |
| pos_3917 | 2-(3-Hydroxy-4-methylphenyl)-5-methyl-4-hexen-3-one                  | down |
| pos_3939 | Mycophenolic acid O-acyl-glucuronide                                 | down |
| pos_3950 | 21-Deoxycortisol                                                     | down |
| pos_3958 | 16-Hydroxy-10-oxohexadecanoic acid                                   | down |
| pos_3981 | Lycofawcine                                                          | down |
| pos_3988 | Dioscoretine                                                         | down |
| pos_4009 | Cys Leu Thr                                                          | down |
| pos_4044 | P-Lactophenetide                                                     | down |
| pos_4133 | L-alpha-Amino-1H-pyrrole-1-hexanoic acid                             | down |
| pos_4173 | Anhydrocinnzeylanol                                                  | down |
| pos_4176 | Methyl 3,4-dicaffeoylquininate                                       | down |
| pos_4254 | Pro Ser Ser                                                          | down |
| pos_4289 | Cytosine                                                             | down |
| neg_210  | 2-Keto-3-deoxy-D-gluconic acid                                       | down |
| neg_755  | (+/-)-2-Hydroxy-4-(methylthio)butanoic acid                          | down |
| neg_780  | L-alpha-Hydroxyisovaleric acid                                       | down |
| neg_794  | 6-(2-Hydroxyethoxy)-6-oxohexanoic acid                               | down |
| neg_804  | 3-(1-Hydroxymethyl-1-propenyl)pentanedioic acid                      | down |
| neg_1141 | Arginyl-Asparagine                                                   | down |
| neg_1622 | 3,5,6,7-tetrahydroxy-2-(4-hydroxy-3-methoxyphenyl)-8aH-chromen-8a-yl | down |
| neg_2117 | Ginsenoside Rh6                                                      | down |
| neg_2132 | Vinaginsenoside R12                                                  | down |
| neg_3780 | 13'-Carboxy-gamma-tocopherol                                         | down |
| neg_4194 | Arjunolic acid 3-glucoside                                           | down |
| neg_4285 | SQDG(2:0/25:0)                                                       | down |
| neg_4625 | Sorbitan laurate                                                     | down |
| neg_4708 | Medicagenic acid 3-O-b-D-glucuronide                                 | down |
| neg_4821 | L-Citronellol glucoside                                              | down |
| neg_4883 | 3-Hydroxytetradecanedioic acid                                       | down |
| neg_4902 | 4'-Dihydroabscisic acid                                              | down |
| neg_4939 | 3-(1,1-Dimethylallyl)scopoletin                                      | down |
| neg_4950 | Helenalin                                                            | down |
| neg_5159 | Suberic acid                                                         | down |
| neg_5204 | 6-Hydroxyhexanoic acid                                               | down |
| neg_5451 | 4-(2-Aminophenyl)-2,4-dioxobutanoic acid                             | down |
| neg_5517 | Hydroxyphenyllactic acid                                             | down |

---
